# Supplementary material for: The density of Tbet+ tumor-infiltrating T lymphocytes reflects an effective and druggable preexisting adaptive antitumor immune response in colorectal cancer, irrespective of the microsatellite status
Source: PubMed Central journal article supplement — Oncoimmunology. 2019 Jan 19;8(4):e1562834. doi: 10.1080/2162402X.2018.1562834 (PMC6422378; doi:10.1080/2162402x.2018.1562834), 2019-01-19
Supplement: koni-08-04-1562834-s001.pdf [file koni-08-04-1562834-s001.pdf]

1  
2  
3  
4  
5  
6  
7  
8  
9  
10  
11  
12  
13  
14  
15  
16  
17  
18  
19  
20  
21  
22  
23  
24  
25  
26  
27  
28  
29  
30  
31  
32  
33  
34  
35  
36  
37  
38  
39  
40  
41  
42  
43  
44  
45  
46  
47  
48  
49  
50  
51  
52  
53  
54  
55  
56  
57  
58  
59  
60  
61  
62  
63  
64  
65

**Figure S1**

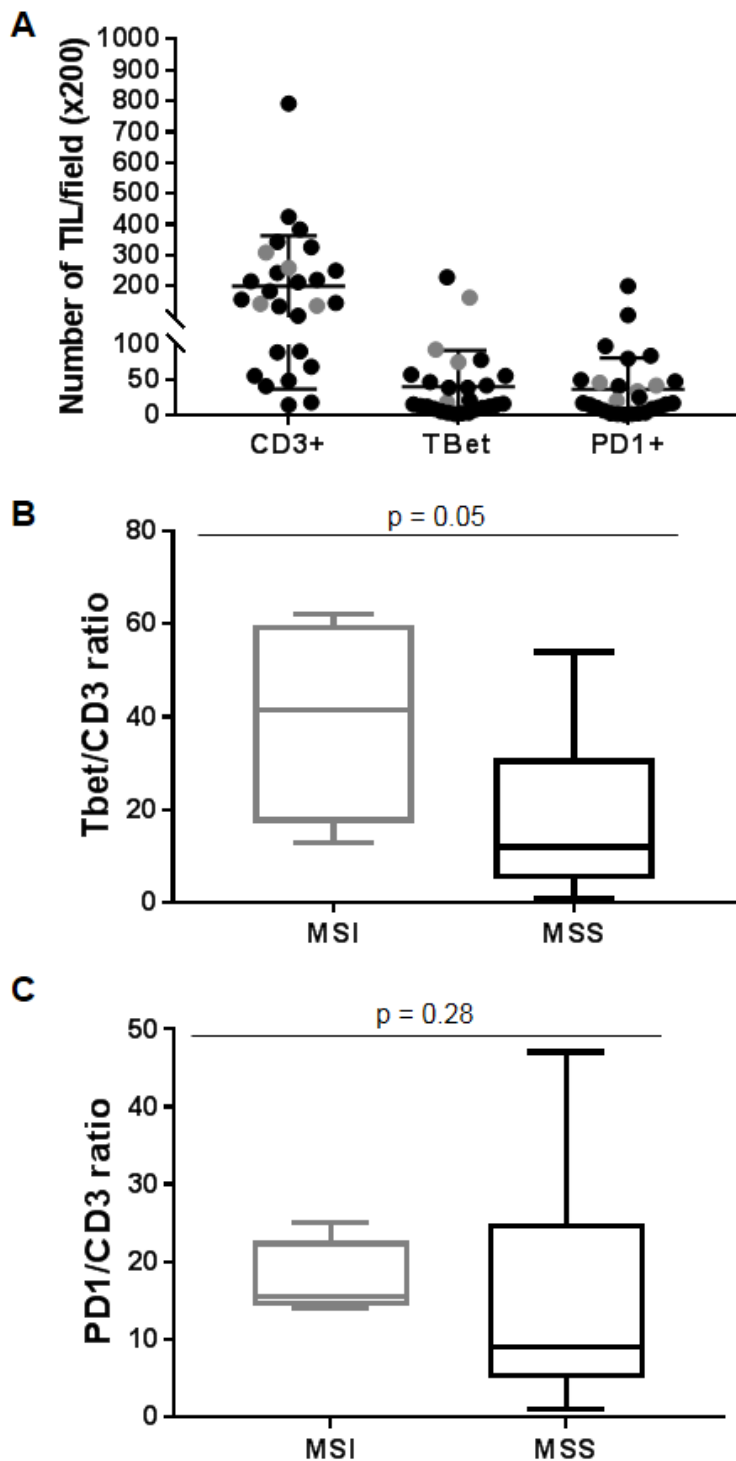

**Figure S1.** Density of TILs in the prospective cohort 2 of CRC (23 MSS and 4 MSI). (A) Density of CD3+, Tbet+, PD1+ TILs. Black dots: MSS CRC; grey dots: MSI CRC. Bars represent mean  $\pm$  sem. (B) (C) Tbet/CD3 and PD1/CD3 ratio according to the MSS/MSI status of CRC.

1  
2  
3  
4  
5  
6  
7  
8  
9  
10  
11  
12  
13  
14  
15  
16  
17  
18  
19  
20  
21  
22  
23  
24  
25  
26  
27  
28  
29  
30  
31  
32  
33  
34  
35  
36  
37  
38  
39  
40  
41  
42  
43  
44  
45  
46  
47  
48  
49  
50  
51  
52  
53  
54  
55  
56  
57  
58  
59  
60  
61  
62  
63  
64  
65

**Figure S2**

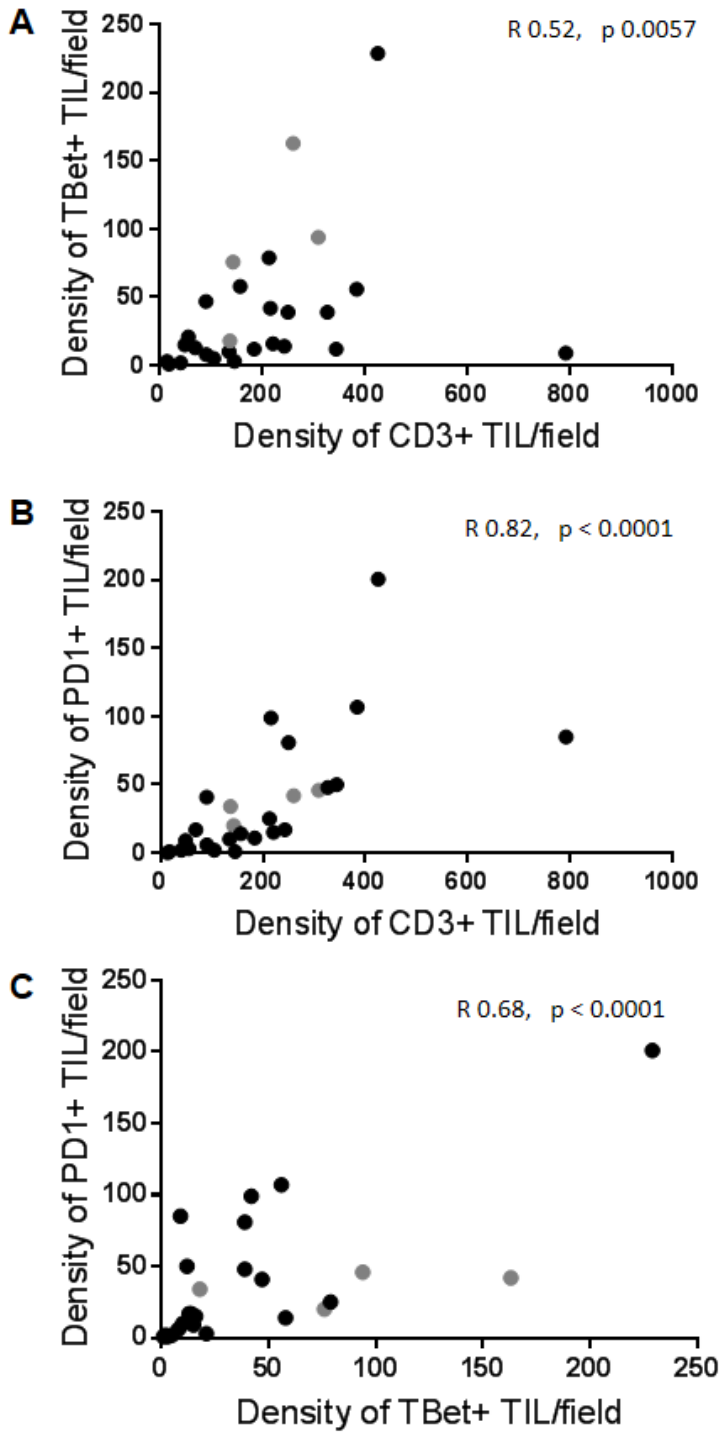

**Figure S2.** Correlation between the different populations of TILs in the prospective cohort 2 of CRC. Significant correlations between CD3+ and Tbet+ (A), CD3+ and PD1+ (B), and between Tbet+ and PD1+ (C) TILs. P values and correlation coefficient were calculated with the Spearman's correlation test. Black dots: MSS CRC; grey dots: MSI CRC.

1  
2  
3  
4  
5  
6  
7  
8  
9  
10  
11 **Figure S3**  
12  
13  
14  
15

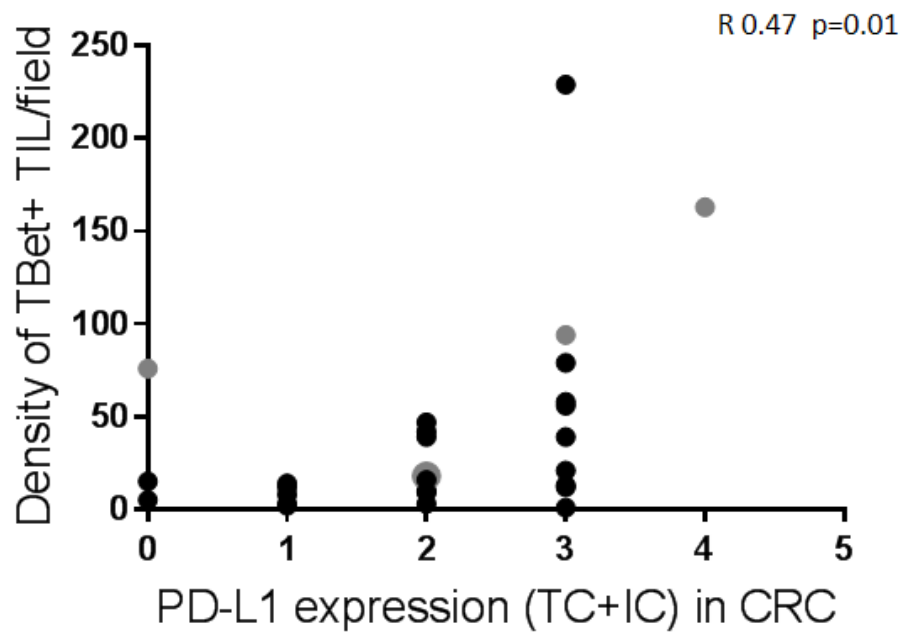

**Figure S3.** Relation between PDL1 expression profile and density of Tbet+ TILs in the prospective cohort 2 of CRC. Significant correlation between the density of Tbet+ TILs and the score of PDL1 expression in tumor cells (TC) and immune cells (IC). Spearman's correlation test. Black dots: MSS CRC; grey dots: MSI CRC.

**Table S1.** Expression profile of PDL1 by tumor cells and/or immune cells among CRC.

|                          | MSI medullary<br>n = 21<br>n (%) | MSI non medullary<br>n = 20<br>n (%) | MSS medullary<br>n = 1<br>n (%) | MSS non medullary<br>n = 38<br>n (%) |
|--------------------------|----------------------------------|--------------------------------------|---------------------------------|--------------------------------------|
| <b>Tumor cells (TC)</b>  |                                  |                                      |                                 |                                      |
| Score 0                  | 8 (38)                           | 14 (70)                              |                                 | 38 (100)                             |
| Score 1-2                | 1 (4.7)                          | 5 (25)                               |                                 |                                      |
| Score 3                  | 4 (19)                           | 1 (5)                                |                                 |                                      |
| Score 4                  | 8 (38)                           | 0                                    |                                 |                                      |
| <b>Immune cells (IC)</b> |                                  |                                      |                                 |                                      |
| Score 0                  | 6 (28.5)                         | 5 (25)                               |                                 | 7 (18.4)                             |
| Score 1                  | 4 (19.1)                         | 3 (15)                               |                                 | 14 (36.8)                            |
| Score 2                  | 8 (38.1)                         | 6 (30)                               |                                 | 17 (44.7)                            |
| Score 3                  | 3 (14.3)                         | 6 (30)                               | 1                               | 0                                    |
| <b>TC + IC</b>           |                                  |                                      |                                 |                                      |
| Score 0                  | 2 (9.5)                          | 5 (25)                               |                                 | 7 (18.4)                             |
| Score 1 - 2              | 3 (14.2)                         | 7 (35)                               |                                 | 31 (81.6)                            |
| Score 3 - 7              | 16 (76.3)                        | 8 (40)                               | 1                               | 0                                    |

**Table S2.** Clinicopathological features of PDL1-positive or IDO-1-positive CRC.

|                                  | PDL1 + (TC + IC)    |                     | PDL1 -<br>n = 14 | IDO-1 + (TC)<br>n = 34 | IDO-1 -<br>n = 46 |
|----------------------------------|---------------------|---------------------|------------------|------------------------|-------------------|
|                                  | Score ≥ 1<br>n = 66 | Score ≥ 3<br>n = 24 |                  | Score ≥ 1              |                   |
| <b>Age</b>                       |                     |                     |                  |                        |                   |
| mean (range)                     | 72.4 (35-95)        | 78.9 (60-95)        | 72.3 (55-89)     | 74 (54-89)             | 71 (35-95)        |
| <b>Gender</b>                    |                     |                     |                  |                        |                   |
| Male                             | 40 (60.6%)          | 7 (29%)             | 9 (64.3%)        | 15 (44)                | 20 (43.5)         |
| Female                           | 26 (39.4%)          | 17 (70.8%) *        | 5 (35.7%)        | 19 (56)                | 26 (56.5)         |
| <b>Stage (UICC)</b>              |                     |                     |                  |                        |                   |
| I                                | 7 (10.6%)           | 0                   | 1 (7)            | 2 (5.9)                | 6 (13)            |
| II                               | 30 (45.5%)          | 14 (58.3%) *        | 3 (21.4)         | 20 (58.8)              | 13 (28.3)         |
| III                              | 19 (29%)            | 7 (29%)             | 6 (43)           | 8 (23.5)               | 17 (37)           |
| IV                               | 10 (15%)            | 3 (12.5%)           | 4 (28.6)         | 4 (11.8)               | 10 (21.7)         |
| <b>Tumor size</b>                |                     |                     |                  |                        |                   |
| mean (cm)                        | 2.64                | 7.06 *              | 5.23             | 6.4                    | 5.7               |
| <b>Histological subtypes</b>     |                     |                     |                  |                        |                   |
| NOS, WD or MD                    | 33 (50%)            | 3 (12.5%)           | 6 (42.8%)        | 13 (38.3%)             | 25 (54.3%)        |
| NOS, PD                          | 2 (3%)              | 2 (8.3%)            | 1 (7%)           | 1 (3%)                 | 1 (2.2%)          |
| Medullary                        | 20 (30.3%)          | 15 (62.5%) *        | 2 (14.3%)        | 11 (32.4%)             | 11 (24)           |
| Mucinous                         | 10 (15.2%)          | 4 (16.6%)           | 4 (28.6%)        | 7 (20.6%)              | 7 (15.2%)         |
| Polymorphous                     | 1 (1.5%)            | 0                   | 0                | 1 (2.9%)               | 2 (4.4%)          |
| Serrated                         | 0                   | 0                   | 1 (7%)           | 1 (2.9%)               | 0                 |
| <b>Tumor site</b>                |                     |                     |                  |                        |                   |
| Right colon                      | 35 (53%)            | 23 (96%) **         | 11 (78.5%)       | 15 (44%)               | 31 (67%) *        |
| Others                           | 31 (47%)            | 1 (4%)              | 3 (21.5%)        | 19 (56%)               | 15 (33%)          |
| <b>Microsatellite/MMR status</b> |                     |                     |                  |                        |                   |
| MSI                              | 34 (51.5%)          | 23 (96%) **         | 7 (50%)          | 19 (56%)               | 22 (48%)          |
| MSS                              | 32 (48.5%)          | 1 (4%)              | 7 (50%)          | 15 (44%)               | 24 (52%)          |
| <b>Mutational status</b>         |                     |                     |                  |                        |                   |
| RAS mutant                       | 14 (24.5%)          | 2 (9%)              | 1 (12.5%)        | 8 (23%)                | 7 (24%)           |
| BRAF mutant                      | 17 (29.8%)          | 13 (59%)            | 4 (50%)          | 12 (34%)               | 9 (31%)           |
| RAS, BRAF wild type              | 26 (45.6%)          | 7 (32%)             | 3 (37.5%)        | 15 (43%)               | 13 (45%)          |
| Unknown                          | 9 (13.6%)           | 2 (8%)              | 6 (43%)          | 11 (24%)               | 5 (15%)           |

WD: well differentiated; MD: moderately differentiated; PD: poorly differentiated; \*p value < 0.05; \*\*p value < 0.01
